# Supplementary material for: Can we see gender through the microscope? The research output using menstrual blood cells has much to say
Source: bioRxiv or medRxiv preprint supplement (doi:10.1101/2022.02.15.22270947), 2022-02-21
Supplement: Supplementary file [file media-1.pdf]

| First author             | Sex | Sex-Software | Country (1st author) | Last author          | Sex | Sex-Softw | Country (last author) | Publishing date | Journal - title                                           | Impact Factor | DOI                              |
|--------------------------|-----|--------------|----------------------|----------------------|-----|-----------|-----------------------|-----------------|-----------------------------------------------------------|---------------|----------------------------------|
| Caroline Gargett         | F   |              | Australia            | James Deane          | M   |           | Australia             | 2015            | Human Reproduction Update                                 | 11.194        | 10.1093/humupd/dmv051            |
| Maria Carolina Rodrigues | F   |              | Brazil               | Cesar Borlongan      | M   |           | USA                   | 2016            | Biobanking and Cryopreservation of Stem Cells (E          | book          | 10.1007/978-3-319-45457-3        |
| Connor Stonesifer        | M   |              | USA                  | Cesar Borlongan      | M   |           | USA                   | 2017            | Progress in Neurobiology                                  | 12.716        | 10.1016/j.pneurobio.2017.07.004  |
| Lu Chen                  |     | F 0.57       | China                | Charlie Xiang        | M   |           | China                 | 2017            | Stem Cell Research & Therapy                              | 5.278         | 10.1186/s13287-016-0453-6        |
| Cesar Borlongan          | M   |              | USA                  | Paul R Sanberg       | M   |           | USA                   | 2010            | Stem Cells And Development                                | 4.922         | 10.1089/scd.2009.0340            |
| Fahimeh Tabatabaei       | F   |              | Iran                 | Jafah Ai             | M   |           | Iran                  | 2017            | Regenerative Medicine                                     | 2.664         | 10.2217/rme-2017-0029            |
| Ilona Uzielienė          | F   |              | Lithuania            | Eiva Bernotiene      | F   |           | Lithuania             | 2018            | Stem Cells International                                  | 3.937         | 10.1155/2018/5748126             |
| Huaijuan Ren             |     | null         | China                | Yantian Chen         |     | F 1.0     | China                 | 2015            | Stem Cells International                                  | 4.616         | 10.1155/2016/3516574             |
| Yanli Liu                |     | F 0.87       | China                | Juntang Lin          |     | M 1.0     | China                 | 2017            | Journal of Cellular and Molecular Medicine                | 4.439         | 10.1111/jcmm.13437               |
| Bingyu Xiang             |     | F 0.64       | China                | Charlie Xiang        | M   |           | China                 | 2017            | International Journal of Molecular Sciences               | 3.962         | 10.3390/ijms18040689             |
| David Eve                | M   |              | USA                  | Krystyna Domanska    | F   |           | Poland                | 2018            | Human Neural Stem Cells (Book)                            | book          | 10.1007/978-3-319-93485-3        |
| Martin A Ivarsson        | M   |              | UK                   | Niklas K. Bjorkstrom | M   |           | UK                    | 2018            | Mucosal Immunology                                        | 6.859         | 10.1038/mi.2016.50               |
| Hossein Eyni             | M   |              | Iran                 | Masoud Soleimani     | M   |           | Iran                  | 2017            | Journal of Biomaterial Applications                       | 2.264         | 10.1177/0885328217723179         |
| Dongmei Lai              |     | F 0.98       | China                | Charlie Xiang        | M   |           | China                 | 2015            | Journal of Translational Medicine                         | 4.222         | 10.1186/s12967-015-0516-y        |
| Haining Lv               |     | M 1.0        | China                | Huidong Jia          | M   |           | UK                    | 2018            | Stem Cell Research & Therapy                              | 4.777         | 10.1186/s13287-018-1067-y        |
| Mehdi Aleahmad           | M   |              | Iran                 | Siwen Zhang          | M   |           | Iran                  | 2018            | Avicenna Journal of Medical Biotechnology                 | 1.55          | PMID: 30090214                   |
| Xiao-Jun Wang            | M   |              | China                | Charlie Xiang        | M   |           | China                 | 2017            | Oncotarget                                                | 4.849         | 10.18632/oncotarget.17621        |
| Saeed Farzamfar          | M   |              | Iran                 | Majid Salehi         | M   |           | Iran                  | 2017            | Molecular Biology Reports                                 | 2.178         | 10.1007/s11033-017-4124-1        |
| Zahra Rajabi             | F   |              | Iran                 | Amir-Hassan Zarnar   | M   |           | Iran                  | 2018            | Reproductive Biology                                      | 2.043         | 10.1016/j.repbio.2018.02.001     |
| Karina Asensi            | F   |              | Brazil               | Regina Goldenberg    | F   |           | Brazil                | 2014            | Journal of Cellular and Molecular Medicine                | 4.605         | 10.1111/jcmm.12226               |
| Razieh Dalirfardouei     | F   |              | Iran                 | Elahe Mahdipour      | F   |           | Iran                  | 2018            | Tissue and Cell                                           | 1.553         | 10.1016/j.tice.2018.09.010       |
| Yanling Zhang            | F   |              | China                | Songying Zhang       | F   |           | China                 | 2016            | Reproduction Research                                     | 3.514         | 10.1530/REP-16-0286              |
| Nikoo Shojanoori         | F   |              | Iran                 | Amir-Hassan Zarnar   | M   |           | Iran                  | 2012            | The Journal of Obstetrics and Gynaecology Resea           | 1.128         | 10.1111/j.1447-0756.2011.01800.x |
| Shulan Zhang             | F   |              | China                | Jingwei Tan          | F   |           | China                 | 2018            | Stem Cell Research & Therapy                              | 4.777         | 10.1186/s13287-018-0750-3        |
| Fereshteh Azedi          | F   |              | Iran                 | Shaghayegh Arasteh   | F   |           | Iran                  | 2017            | Molecular Biology Reports                                 | 2.178         | 10.1007/s11033-016-4095-7        |
| Dongmei Lai              |     | F 0.98       | China                | Charlie Xiang        | M   |           | China                 | 2016            | Acta Biochimica et Biophysica Sinica                      | 2.148         | 10.1093/abbs/gmw090              |
| Yuliang Sun              |     | M 0.93       | China                | Juntang Lin          |     | M 1.0     | China                 | 2019            | Biology Open                                              | 2.026         | 10.1242/bio.038885               |
| Paul R. Sanberg          | M   |              | USA                  | Cesar V Borlongan    | M   |           | USA                   | 2011            | Cell Transplantation                                      | 4.116         | 10.3727/096368910X532855         |
| Daniela Ulrich           | F   |              | Australia            | Caroline Gargett     | F   |           | Australia             | 2013            | Expert Opinion Biological Therapy                         | 4.120         | 10.1517/14712598.2013.826187     |
| Kana Sugawara            |     | F 0.8        | Japan                | Akihiro Umezawa      | M   |           | Japan                 | 2014            | Scientific Reports                                        | 5.990         | 10.1038/srep04599                |
| Mahmood Bozorgmerh       | M   |              | Iran                 | Amir-Hassan Zarnar   | M   |           | Iran                  | 2014            | Immunology Letters                                        | 2.868         | 10.1016/j.imlet.2014.10.005      |
| Mina Fathi-Kazerooni     | F   |              | Iran                 | Somaieh Kazemnejad   | F   |           | Iran                  | 2017            | Cytotherapy                                               | 4.017         | 10.1016/j.jcyt.2017.08.022       |
| Davood Mehrabani         | M   |              | Iran                 | Farnaz Ghobadi       | F   |           | Iran                  | 2016            | <u>Iranian Journal of Medical Sciences</u>                | 0.94          | PMID: 26989284                   |
| Filippo Rossignoli       | M   |              | Italy                | Massimo Dominici     | M   |           | Italy                 | 2013            | BioMed Research International                             | 3.276         | 10.1155/2013/901821              |
| Shohreh Nikoo            | F   |              | Iran                 | Amir-Hassan Zarnar   | M   |           | Iran                  | 2014            | Molecular Human Reproduction                              | 4.209         | 10.1093/molehr/gau044            |
| Frederico Allison-Silva  | M   |              | Brazil               | Adriane Todeschini   | F   |           | Brazil                | 2014            | Glycobiology                                              | 3.595         | 10.1093/glycob/cwu012            |
| Yanping Xu               |     | F 0.7        | China                | Jichun Tan           | M   |           | China                 | 2015            | <u>International Journal of Clinical and Experimental</u> | 1.316         | PMID: 26885178                   |
| Xue Du                   | F   |              | China                | Jia Bei              | F   |           | UK                    | 2016            | Stem Cells International                                  | 3.756         | 10.1155/2016/3573846             |
| R Moreno                 |     |              | Spain                | Rafael Alemany       | M   |           | Spain                 | 2017            | Stem Cells International                                  | 3.959         | 10.1155/2017/3615729             |
| Te Liu                   | M   |              | China                | Chuan Chen           |     | M 0.86    | China                 | 2014            | Stem Cells International                                  | 3.582         | 10.1089/scd.2013.0371            |
| Marina V. Kovina         | F   |              | Russia               | Alexey V. Lyubdup    | M   |           | Russia                | 2018            | Cytotherapy                                               | 4.120         | 10.1016/j.jcyt.2017.12.012       |
| Danubia Silva dos Santos | F   |              | Brazil               | Regina Goldenberg    | F   |           | Brazil                | 2014            | Cell Medicine                                             |               | 10.3727/215517914X679265         |
| Saeedeh Darzi            | F   |              | Iran                 | Somaieh Kazemnejad   | F   |           | Iran                  | 2012            | Tissue Engineering                                        | 4.946         | 10.1089/ten.tea.2011.0386        |
| Irina Kozhkharaova       | F   |              | Russia               | Nikolay Nikolsky     | M   |           | Russia                | 2017            | <u>International Journal of Hematology</u>                | 2.152         | 10.1007/s12185-017-2346-6        |
| Lijun Chen               |     | F 0.51       | China                | Charlie Xiang        | M   |           | China                 | 2016            | Stem Cells Translational Medicine                         | 4.672         | 10.5966/sctm.2015-0265           |
| Natalia Russo            | F   |              | Italy                | Andrea Riccardo Ge   | M   |           | Italy                 | 2012            | Gynecological Endocrinology                               | 1.607         | 10.3109/09513590.2011.633667     |
| Rafael Moreno            | M   |              | Spain                | Ramon Alemany        | M   |           | Spain                 | 2018            | Molecular Cancer Therapeutics                             | 5.151         | 10.1158/1535-7163.MCT-18-0431    |
| Deivid de Carvalho Rodri | M   |              | Brazil               | Turán Péter Úrményi  | M   |           | Brazil                | 2012            | Cell Transplantation                                      | 4.810         | 10.3727/096368912X653048         |
| Saeed Farzamfar          | M   |              | Iran                 | Mehdi Aleahmad       | M   |           | Iran                  | 2018            | Biomedical Engineering Letters                            | 1.2           | 10.1007/s13534-018-0084-1        |
| Naoko Hida               | F   |              | Japan                | Akihiro Umezawa      | M   |           | Japan                 | 2008            | Stem Cells                                                | 9.162         | 10.1634/stemcells.2007-0826      |
| Yongjia Zhao             |     | M 0.71       | Japan                | Charlie Xiang        | M   |           | Japan                 | 2018            | Frontiers in Molecular Neuroscience                       | 3.814         | 10.3389/fnmoi.2018.00140         |
| Zhaocai Zhang            |     | M 1.0        | China                | Hong Yo              |     | M 0.65    | China                 | 2013            | International Journal of Cardiology                       | 1.882         | 10.1016/j.ijcard.2013.03.126     |

|                       |   |        |           |                        |   |        |           |      |                                                         |       |                              |
|-----------------------|---|--------|-----------|------------------------|---|--------|-----------|------|---------------------------------------------------------|-------|------------------------------|
| Patricia Luz-Crawford | F |        | Chile     | Maroun Khoury          | M |        | Chile     | 2015 | Stem Cells                                              | 6.585 | 10.1002/stem.2244            |
| Dah-Ching Ding        | F |        | Taiwan    | Shinn-Zong Lin         | M |        | Taiwan    | 2011 | Cell Transplantation                                    | 4.116 | 10.3727/096368910X           |
| Jinyang Chen          |   | M 0.69 | China     | Charlie Xiang          | M |        | China     | 2015 | International Journal of Clinical and Experimental      | 1.825 | PMID: 26823782               |
| Jichun Tan            | M |        | China     | Lin Kong               |   | F 0.63 | China     | 2016 | Human Reproduction                                      | 5.020 | 10.1093/humrep/dew235        |
| Julie Allickson       | F |        | USA       | Paul R. Sanberg        | M |        | USA       | 2011 | Open Stem Cell Journal                                  |       | 10.2174/1876893801103010004  |
| Haiyan Zhu            |   | F 0.9  | China     | Songying Zhang         | F |        | China     | 2018 | Reproductive Biology                                    | 2.043 | 10.1016/j.repbio.2018.06.003 |
| Biröl Ay              | M |        | Turkey    | Halime Kenar           | F |        | Turkey    | 2016 | Journal of Biomedical Materials Research Part A         | 3.607 | 10.1002/jbm.a.35948          |
| Jian Lin              |   | M 0.9  | China     | Charlie Xiang          | M |        | China     | 2011 | Journal of Zhejiang University                          | 1.482 | 10.1631/jzus.B1100015        |
| Shanti Gurung         | F |        | Australia | Caroline E. Gargett    | F |        | Australia | 2015 | Seminars in Reproductive Medicine                       | 2.776 | 10.1055/s-0035-1558405       |
| Shaghayegh Arasteh    | F |        | Iran      | Somaieh Kazemnejad     | F |        | Iran      | 2018 | Stem Cell Nanotechnology (book)                         | book  | 10.1007/7651_2018_193        |
| Maroun Khoury         | M |        | Chile     | Fernando E. Figueroa   | M |        | Chile     | 2014 | Frontier in Immunology                                  | 4.994 | 10.3389/fimmu.2014.00205     |
| Shixia Bu             |   | F 1.0  | China     | Dongmei Lai            |   | F 0.98 | China     | 2016 | Scientific Reports                                      | 4.738 | 10.1038/srep37019            |
| Ozge Karadas          | F |        | Turkey    | Vasif Hasirci          | M |        | Turkey    | 2012 | Journal of Tissue Engineering and Regenerative          | 2.989 | 10.1002/term.1555            |
| Somaieh Kazemnejad    | F |        | Iran      | Saghari S              | M |        | Iran      | 2013 | Journal of Stem Cells and Regenerative Medicine         | 0.22  | 10.46582/jsrm.0901004        |
| Caroline E. Gargett   | F |        | Australia | Hirotsuka Masuda       | M |        | Australia | 2010 | Molecular Human Reproduction                            | 3.660 | 10.1093/molehr/gaq061        |
| Sheng-Xia Zheng       |   | M 1.0  | China     | Yu-Sheng Liu           | M |        | China     | 2018 | International Journal of Molecular Medicine             | 3.024 | 10.3892/ijmm.2018.3415       |
| Xuqi Hu               |   | F 1.0  | China     | Huazi Xu               |   | M 0.64 | China     | 2014 | Spine Journal                                           | 2.445 | 10.1097/BRS.0000000000000261 |
| Hossein Faramarzi     | M |        | Iran      | Reza Shirazi           | M |        | Iran      | 2016 | World Journal of Plastic Surgery                        |       | PMID: 27308237               |
| Qinfeng Wu            |   | M 1.0  | China     | Chuanming Dong         |   | M 1.0  | China     | 2018 | Cell Death and Disease                                  | 6.083 | 10.1038/s41419-018-0847-8    |
| Julie Allickson       | F |        | USA       | Charlie Xiang          | M |        | China     | 2012 | Journal of Zhejiang University - Science B              | 1.456 | 10.1631/jzus.B1200062        |
| Yijing Zheng          |   | F 0.88 | China     | Jianjun Hong           |   | M 0.97 | China     | 2017 | Experimental and Therapeutic Medicine                   | 1.551 | 10.3892/etm.2017.4383        |
| Manijeh Khanmohammadi | F |        | Iran      | Somaieh Kazemnejad     | F |        | Iran      | 2012 | International Journal of Hematology                     | 2.106 | 10.1007/s12185-012-1067-0    |
| Xiao- Zhou Mou        |   | M 0.75 | China     | Charlie Xiang          | M |        | China     | 2013 | Journal of Zhejiang University - Science B              | 1.733 | 10.1631/jzus.B1300081        |
| Stanimir Kyurkchiev   | M |        | Bulgaria  | Rumen Dimitrov         | M |        | Bulgaria  | 2010 | Reproductive BioMedicine Online                         | 2.869 | 10.1016/j.rbmo.2009.12.011   |
| Maryam Fard           | F |        | Iran      | Reza Shirazi           | M |        | Iran      | 2018 | Molecular Biotechnology                                 | 1.811 | 10.1007/s12033-017-0049-0    |
| Haitao Ren            |   | M 0.94 | China     | Ruolang Pan            |   | null   | China     | 2018 | Stem Cells International                                | 3.937 | 10.1155/2018/7873625         |
| Xiaoxi Xu             |   | F 0.6  | Canada    | Hao Wang               | M |        | Canada    | 2016 | Stem Cells Translational Medicine                       | 4.672 | 10.5966/sctm.2016-0206       |
| Yanli Liu             |   | F 0.87 | China     | Juntang Lin            |   | F 0.98 | China     | 2018 | Stem Cells International                                | 3.937 | 10.1155/2018/3250379         |
| Naoki Tajiri          | M |        | USA       | Yuji Kaneko            | M |        | USA       | 2014 | International Journal of Molecular Sciences             | 3.385 | 10.3390/ijms150915225        |
| Amit N. Patel         | M |        | USA       | Julie Allickson        | F |        | USA       | 2008 | Cell Transplantation                                    | 4.356 | 10.3727/096368908784153922   |
| Manijeh Khanmohammadi | F |        | Iran      | Somaieh Kazemnejad     | F |        | Iran      | 2014 | Cell Proliferation                                      | 3.734 | 10.1111/cpr.12133            |
| Ana Laura Alfano      | F |        | Argentina | Veronica Lopez         | F |        | Argentina | 2017 | Molecular Therapy Oncotargets                           | 3.915 | 10.1016/j.omto.2017.06.002   |
| Alisa P. Domnina      | F |        | Russia    | Nikolay N. Nikolsky    |   | M 0.99 | Russia    | 2016 | Experimental and Therapeutic Medicine                   | 1.490 | 10.3892/etm.2016.3671        |
| Bruna R. Sousa        | F |        | Brazil    | Rodrigo R. Resende     | M |        | Brazil    | 2013 | Cytometry Part A                                        | 3.421 | 10.1002/cyto.a.22402         |
| Sayeh Khanjani        | F |        | Iran      | Somaieh Kazemnejad     | F |        | Iran      | 2014 | PLOS ONE                                                | 3.778 | 10.1371/journal.pone.0086075 |
| Xiaohan Wang          |   | F 0.69 | China     | Cuffang Hao            |   | null   | China     | 2018 | Journal of Cellular Biochemistry                        | 3.448 | 10.1002/jcb.28014            |
| Jin-Yang Chen         |   | M 0.69 | China     | Charlie Xiang          | M |        | China     | 2015 | Asian Pacific Journal of Tropical Medicine              | 1.630 | 10.1016/j.apjtm.2015.07.022  |
| Yang Li               |   | M 0.64 | China     | Jichun Tan             | M |        | China     | 2013 | Stem Cells and Development                              | 4.710 | 10.1089/scd.2012.0428        |
| Pham Van Phuc         | M |        | Vietnam   | Phan Kim Ngoc          | M |        | Vietnam   | 2011 | In Vitro Cellular & Developmental Biology - Animal      | 1.665 | 10.1007/s11626-011-9399-2    |
| Federica Marino       | F |        | Spain     | Beatriz Macías- García | F |        | Spain     | 2018 | Reproduction in Domestic Animals                        | 1.614 | 10.1111/rda.13314            |
| Somaieh Kazemnejad    | F |        | Iran      | Kamran Alimoghadda     | M |        | Iran      | 2012 | The International Journal of Artificial Organs          | 1.961 | 10.5301/ijao.5000019         |
| Sayeh Khanjani        | F |        | Iran      | Somaieh Kazemnejad     | F |        | Iran      | 2015 | Journal of Tissue Engineering and Regenerative Medicine | 3.211 | 10.1002/term.1715            |
| Xiaoxing Wu           |   | M 0.56 | China     | Charlie Xiang          | M |        | China     | 2014 | Stem Cells and Development                              | 4.349 | 10.1089/scd.2013.0390        |
| Marjan D. Manshadi    | F |        | Iran      | Mehdi Abbasi           | M |        | Iran      | 2018 | Microscopy Research and Technique                       | 1.355 | 10.1002/jemt.23120           |
| Javad Verdi           | M |        | UK        | Alexander M. Seifali   | M |        | UK        | 2014 | Journal of Biological Engineering                       | 3.143 | 10.1186/1754-1611-8-20       |
| Fengyi Gou            |   | M 0.89 | China     | Xue Du                 | F |        | China     | 2019 | Reproductive Biology and Endocrinology                  | 3.498 | 10.1186/s12958-019-0499-2    |
| Zhi Jaing             |   | M 0.75 | China     | Jian-an Wang           | M |        | China     | 2013 | Journal of Cellular and Molecular Medicine              | 4.258 | 10.1111/jcmm.12100           |
| Fereshteh Azedi       | F |        | Iran      | Niknam Lakpour         | M |        | Iran      | 2014 | Cell Biology International                              | 2.160 | 10.1002/cbin.10245           |
| Yongcheng Lv          |   |        | China     | Hao Wang               |   | M 0.89 | China     | 2014 | Journal of Translational Medicine                       | 4.630 | 10.1186/s12967-014-0344-5    |
| Amit N. Patel         | M |        | USA       | Francisco Silva        | M |        | Argentina | 2008 | Regenerative Medicine                                   | 2.950 | 10.1016/j.hfc.2014.12.006    |
| Maryam Rahimi         | F |        | Iran      | Somaieh Kazemnejad     | F |        | Iran      | 2014 | Molecular Biotechnology                                 | 2.215 | 10.1007/s12033-014-9795-4    |
| Shanzheng Lu          |   |        | China     | Hao Wang               |   | M 0.89 | China     | 2016 | Journal of Translational Medicine                       | 4.155 | 10.1186/s12967-016-1051-1    |
| Hongyun Huang         |   | M 1.0  | China     | Paul Sanberg           | M |        | USA       | 2010 | Cell Medicine                                           |       | 10.3727/215517910X516673     |

|                         |          |        |             |                        |   |             |             |      |                                                              |       |                                   |
|-------------------------|----------|--------|-------------|------------------------|---|-------------|-------------|------|--------------------------------------------------------------|-------|-----------------------------------|
| James A. Deane          | M        |        | Australia   | Caroline E. Gargett    | F |             | Australia   | 2013 | Current Opinion in Obstetrics & Gynecology                   | 3.061 | 10.1097/GCO.0b013e32836024e7      |
| Yukinori Ikegami        | M        |        | Japan       | Akihiro Umezawa        | M |             | Japan       | 2010 | Artificial Organs                                            | 1.654 | 10.1111/j.1525-1594.2009.00859.x  |
| Jia Hu                  |          | F 0.63 | China       | Bu-Zhen Tan            |   | Null        | China       | 2019 | Molecular Medicine Reports                                   | 2.085 | 10.3892/mmr.2018.9744             |
| Maryam Rahimi           | F        |        | Iran        | Somaieh Kazemnejad     | F |             | Iran        | 2014 | Journal of Biomaterial Applications                          | 2.365 | 10.1177/0885328213519835          |
| Penghui Feng            |          | M 1.0  | China       | Jichun Tan             | M |             | China       | 2018 | Stem Cell Reviews and Reports                                | 4.924 | 10.1007/s12015-018-9867-0         |
| Peng Sun                |          | M 0.84 | China       | Hao Wang               |   | M 0.89      | China       | 2016 | Journal of Translational Medicine                            | 4.155 | 10.1186/s12967-016-0782-3         |
| Yiming Zhao             |          | M 0.82 | China       | Hao Wang               |   | M 0.89      | China       | 2018 | Stem Cells International                                     | 3.937 | 10.1155/2018/3475137              |
| Man-Jing Zhang          |          | F 1.0  | China       | Kai-Hua Lu             |   | M 0.86      | China       | 2009 | Medical Hypotheses                                           | 1.700 | 10.1016/j.mehy.2008.10.021        |
| Xiaoxi Xu               |          | M 0.56 | China       | Hao Wang               |   | M 0.89      | China       | 2018 | Stem Cell Research & Therapy                                 | 4.777 | 10.1186/s13287-018-0874-5         |
| Michael P. Murphy       | M        |        | USA         | Niel H. Riordan        | M |             | USA         | 2008 | Journal of Translational Medicine                            | 3.361 | 10.1186/1479-5876-6-45            |
| Xiuhui Chen             |          | F 0.86 | China       | Meimei Liu             |   | F 0.96      | China       | 2016 | International Journal of Molecular Medicine                  | 2.579 | 10.3892/ijmm.2016.2593            |
| Mohammad-Reza Shokri    | M        |        | Iran        | Amir-Hassan Zarnani    | M |             | Iran        | 2019 | Scientific Reports                                           | 4.149 | 10.1038/s41598-019-46316-3        |
| Xinxin Zhu              | F        |        | China       | Lijun Ding             |   | F 0.51      | China       | 2019 | Current Stem Cell Research & Therapy                         | 2.614 | 10.2174/1574888X14666181205120110 |
| Rafael Moreno           | M        |        | Spain       | Ramon Alemany          | M |             | Spain       | 2018 | Molecular Cancer Therapeutics                                | 5.151 | 10.1158/1535-7163.MCT-18-0431     |
| Lijun Chen              | M (Foto) | F 0.51 | China       | Charlie Xiang          | M |             | China       | 2019 | Stem Cell Research & Therapy                                 | 5.081 | 10.1186/s13287-018-1105-9         |
| Yun-xia Zhao            | F        |        | China       | Shu Lin                |   | F 0.57      | Australia   | 2019 | Stem Cell International                                      | 3.873 | 10.1155/2019/9071720              |
| Lijun Chen              | M (Foto) | F 0.51 | China       | Charlie Xiang          | M |             | China       | 2019 | Stem Cell Research & Therapy                                 | 5.081 | 10.1186/s13287-019-1503-7         |
| Aneta Sciezynska        | F        |        | Poland      | Jacek Malejczyk        | M |             | Poland      | 2019 | Journal of Clinical Medicine                                 | 5.583 | 10.3390/jcm8091468                |
| Siwen Zhang             | M        |        | China       | Jichun Tan             | M |             | China       | 2019 | Stem Cell Research & Therapy                                 | 5.081 | 10.1186/s13287-019-1155-7         |
| Qian-Yu Liu             |          | F 0.7  | China       | Quan-Wen Liu           |   | M 1.0       | China       | 2019 | Stem Cell International                                      | 3.873 | 10.1155/2019/9280298              |
| Yi-Chen Wu              | (foto)   | M 0.6  | China       | Charlie Xiang          | M |             | China       | 2019 | Stem Cell Research & Therapy                                 | 5.081 | 10.1186/s13287-019-1243-8         |
| Marjan D. Manshadi      | F        |        | Iran        | Mehdi Abbasi           | M |             | Iran        | 2018 | Microscopy Research and Technique                            | 1.355 | 10.1002/jemt.23120                |
| Yanli Liu               |          | F 0.87 | China       | Nan Ma                 | F |             | Germany     | 2019 | Cellular and Molecular Life Sciences                         | 6.484 | 10.1007/s00018-019-03019-2        |
| Parastoo Noory          | F        |        | Iran        | Mehdi Abbasi           | M |             | Iran        | 2019 | Cellular Reprogramming                                       | 1.682 | 10.1089/cell.2019.0020            |
| Pan-Pan Cen             |          | M 0.62 | China       | Lan-Juan Li            |   | F 1.0       | China       | 2019 | World Journal of Gastroenterology                            | 3.602 | 10.3748/wjg.v25.i41.6190          |
| Elahe Mahdipour         | F        |        | Iran        | Nona Sabeti            |   | F 0.95      | Iran        | 2019 | Journal of Cellular Physiology                               | 5.546 | 10.1002/jcp.28631                 |
| Yang Guo                |          | M 0.64 | China       | Charlie Xiang          | M |             | China       | 2019 | Stem Cell and Development                                    | 3.145 | 10.1089/scd.2018.0222             |
| Paula Barlabé           | F        |        | Spain       | Rafael Moreno          | M |             | Spain       | 2019 | Cancer Gene Therapy                                          | 4.472 | 10.1038/s41417-019-0110-1         |
| Hanna Manley            | F        |        | UK          | Philip Breedon         | M |             | UK          | 2019 | Journal of Women's Health                                    | 2.332 | 10.1089/jwh.2019.7745             |
| Song Chen               |          | M 0.69 | China       | Jian Chen              |   | M 0.9       | China       | 2019 | In Vitro Cellular & Developmental Biology - Anim             | 1.587 | 10.1007/s11626-018-0311-1         |
| Han Li                  |          | M 0.73 | Malaysia    | Juntang Lin            |   | M 1.0       | China       | 2019 | Frontiers in Molecular Neuroscience                          | 4.161 | 10.3389/fnmol.2019.00080          |
| Razieh Dalirfardouei    | F        |        | Iran        | Elahe Mahdipour        | F |             | Iran        | 2019 | Journal of Tissue Engineering and Regenerative               | 3.241 | 10.1002/term.2799                 |
| Pavel Deryabin          | M        |        | Russia      | Aleksandra Borodkina   | F |             | Russia      | 2019 | Cell Cycle                                                   | 3.699 | 10.1080/15384101.2019.1593650     |
| Mina Fathi-Kazerooni    | F        |        | Iran        | Gholamreza Tavoos      | M |             | Iran        | 2019 | Avicenna Journal of Medical Biotechnology                    | 1.22  | PMID: 31908739                    |
| Andrea Patrizia Salzman | F        |        | Switzerland | Cordula Haas           | F |             | Switzerland | 2019 | Forensic Science International: Genetics                     | 5.786 | 10.1016/j.fsigen.2019.102149      |
| Akos Dobay              | M        |        | Switzerland | Natasha Arora          | F |             | Switzerland | 2019 | Forensic Science International: Genetics                     | 5.786 | 10.1016/j.fsigen.2019.02.010      |
| Ganggang Shi            |          | M 0.94 | China       | Hao Wang               |   | M 0.89      | China       | 2019 | American Journal of Translational Research                   | 3.375 | PMID: 31497192                    |
| Manijeh Khanmohammadi   | F        |        | Iran        | Somaieh Kazemnejad     | F |             | Iran        | 2019 | Tissue Engineering and Regenerative Medicine                 | 3.241 | 10.1007/s13770-019-00189-9        |
| Zhongrui Yan            |          | M 1.0  | China       | Xue Du                 | F |             | China       | 2019 | Stem Cell Research & Therapy                                 | 5.081 | 10.1186/s13287-018-1101-0         |
| Penghui Feng            |          | M 1.0  | China       | Jichun Tan             |   | M 0.67      | China       | 2019 | Stem Cell Reviews and Reports                                | 5.353 | 10.1007/s12015-018-9867-0         |
| Shouyu Wang             |          | F 0.5  | China       | Yiping Hou (M - news)  |   | M 0.53      | China       | 2019 | Forensic Science International: Genetics                     | 4.884 | 10.1016/j.fsigen.2019.01.002      |
| Marine Legrand          | F        |        | France      | Anais Tondeur          | F |             | France      | 2019 | Journal International de Bioethique et d'ethique de la Santé |       | 10.3917/jibes.304.0019            |
| Mina Fathi-Kazerooni    | F        |        | Iran        | Gholamreza Tavoosidana | M | 0.99        | Iran        | 2019 | Biologicals                                                  | 1.795 | 10.1016/j.biologicals.2019.02.002 |
| Sook Young Yoon         |          | F 0.92 | Korea       | autor unico            |   | F 0.92      | Korea       | 2019 | Clinical and Experimental Reproductive Medicine              | 1.688 | 10.5653/cerm.2019.46.1.1          |
| Alireza Ghanavatinejad  | M        |        | Iran        | Amir-Hassan Zarnani    | M |             | Iran        | 2020 | Journal of Reproductive Immunology                           | 3.535 | 10.1016/j.jri.2020.103252         |
| Ebrahim Mirzadegan      | M        |        | Iran        | Somaieh Kazemnejad     | F |             | Iran        | 2020 | International Immunopharmacology                             | 3.943 | 10.1016/j.intimp.2020.106595      |
| Celia Díez López        | F        |        | Netherlands | Manfred Kayser         | M |             | Netherlands | 2020 | Forensic Science International: Genetics                     | 4.117 | 10.1016/j.fsigen.2020.102280      |
| Paula Barlabé           | F        |        | Spain       | Rafael Moreno          | M |             | Spain       | 2020 | Cancer Gene Therapy                                          | 4.883 | 10.1038/s41417-019-0110-1         |
| Xin Chen                |          | F 0.52 | China       | Charlie Xiang          | M |             | China       | 2020 | Stem Cell Research & Therapy                                 | 5.985 | 10.1186/s13287-020-01926-x        |
| Rocio Martínez-Aguilar  |          | F 0.99 | Spain       | Ana C. Abadía-Molín    | F |             | Spain       | 2020 | Scientific Reports                                           | 4.13  | 10.1038/s41598-020-78423-x        |
| Limei Chen              |          | F 1.0  | China       | Long Sui               |   | M 0.93      | China       | 2020 | American Journal of Translational Research                   | 3.827 | PMID:33042399                     |
| Shaghayegh Arasteh      | F        |        | Iran        | Somaieh Kazemnejad     | F |             | Iran        | 2020 | Stem Cell Nanotechnology (Book)                              | book  | 10.1007/7651_2018_193             |
| Zidong Liu              |          | M 1.0  | China       | Gengqian Zhang         |   | M (Foto of) | China       | 2020 | Electrophoresis Journal                                      | 3.062 | 10.1002/elps.202000053            |

|                         |   |        |             |                       |        |            |           |      |                                                 |       |                            |
|-------------------------|---|--------|-------------|-----------------------|--------|------------|-----------|------|-------------------------------------------------|-------|----------------------------|
| Mahmood Bozorgmehr      | M |        | Iran        | Caroline E. Gargett   | F      |            | Australia | 2020 | Frontiers in Cell and Developmental Biology     | 5.868 | 10.3389/fcell.2020.00497   |
| Rosana de Almeida Sant  | F |        | Brazil      | Regina Coeli dos Sa   | F      |            | Brazil    | 2020 | International Journal of Molecular Sciences     | 5.542 | 10.3390/ijms21249563       |
| Sedighe Esmailzadeh     | F |        | Iran        | Mohammad Ghasem       | M      |            | Iran      | 2020 | The Journal of Obstetrics and Gynaecology Resea | 1.524 | 10.1111/jog.14340          |
| Shanti Gurung           | F |        | Australia   | Caroline E. Gargett   | F      |            | Australia | 2020 | Journal of Personalized Medicine                | 1.462 | 10.3390/jpm10040261        |
| Alicia Sanchez-Mata     | F |        | Spain       | Elena Gonzalez-Mu     | F      |            | Spain     | 2020 | iScience                                        | 5.080 | 10.1016/j.xpro.2020.100183 |
| Jiajia Chen             |   | F 0.78 | China       | Lanjuan Li            |        | F 1.0      | China     | 2020 | Engineering                                     | 6.495 | 10.1016/j.eng.2020.02.006  |
| Lidia Lopez-Caraballo   | F |        | Spain       | Elena Gonzalez-M      | F      |            | Spain     | 2020 | iScience                                        | 5.080 | 10.1016/j.isci.2020.101376 |
| Wang Jin                |   | M 0.67 | China       | Hao Wang              |        | M 0.89     | China     | 2020 | Stem Cells International                        | 4.72  | 10.1155/2020/4820543       |
| Wenchun Qu              | M |        | USA         | Fred P. Sanfilippo    | M      |            | USA       | 2020 | Stem Cells Translational Medicine               | 5.607 | 10.1002/sctm.20-0146       |
| Marianna Ferreira Gonca | F |        | Brazil      | Regina Coeli dos Sa   | F      |            | Brazil    | 2020 | Tissue Engineering                              | 3.312 | 10.1089/ten.tea.2020.0034  |
| Qi-Yuan Chang           |   | M 0.83 | China       | Ji-Chun Tan           |        | M 0.67-0.7 | China     | 2020 | World Journal of Stem Cells                     | 5.326 | 10.4252/wjsc.v12.i5.368    |
| Simin Zafardoust        |   | F 0.88 | Iran        | Afsaneh Mohammadzadeh | F 0.98 |            | Iran      | 2020 | Stem Cell Reviews and Reports                   | 4.813 | 10.1007/s12015-020-09969-6 |
| Hyun Sok Chung          |   | M 0.63 | South Korea | Autor único           |        | M 0.63     |           | 2019 | Korean Journal of Medical History               | 0.12  | 10.13081/kjmh.2019.28.239  |
